# Supplementary material for: Promoted Performance of Layered Perovskite PrBaFe2O5+δ Cathode for Protonic Ceramic Fuel Cells by Zn Doping
Source: MDPI journal article supplement (doi:10.3390/catal12050488), 2022-04-27
Supplement: s1 [file s1]

---

## Supplementary Material

### Promoted performance of layered perovskite $\text{PrBaFe}_2\text{O}_{5+\delta}$ cathode for protonic ceramic fuel cells by Zn doping

Birkneh Sirak Teketel <sup>1,2,3</sup>, Bayu Admasu Beshiwork <sup>1,3</sup>, Dong Tian <sup>3</sup>, Shiyue Zhu <sup>3</sup>, Halefom G.  
Desta <sup>1,3</sup>, Khan Kashif <sup>1</sup>, Yonghong Chen <sup>3</sup>, Bin Lin <sup>1,2,3,\*</sup>

1. School of Mechanical and Electrical Engineering, School of Materials and Energy, University of Electronic Science and Technology of China, Chengdu 611731, P.R. China
2. Yangtze Delta Region Institute (Huzhou), University of Electronic Science and Technology of China, Huzhou 313001, P. R. China
3. Anhui Key Laboratory of Low-Temperature Co-Fired Material, Huainan Engineering Research Center for Fuel Cells, Huainan Normal University, Huainan 232001, P.R. China

[\*] Corresponding Author: Prof. Bin Lin, School of Mechanical and Electrical Engineering, University of Electronic Science and Technology of China, Chengdu 611731, P.R. China

(E-mail): bin@uestc.edu.cn

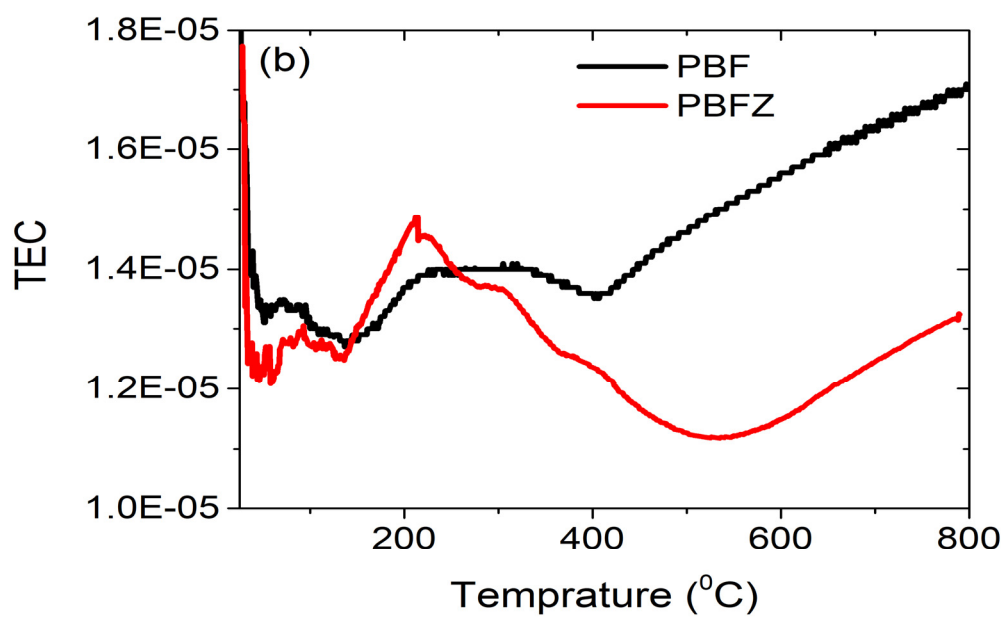

**Figure S1.** Thermal expansion coefficient of the PBFZ and PBF samples between room temperature and 800  $^{\circ}\text{C}$ .

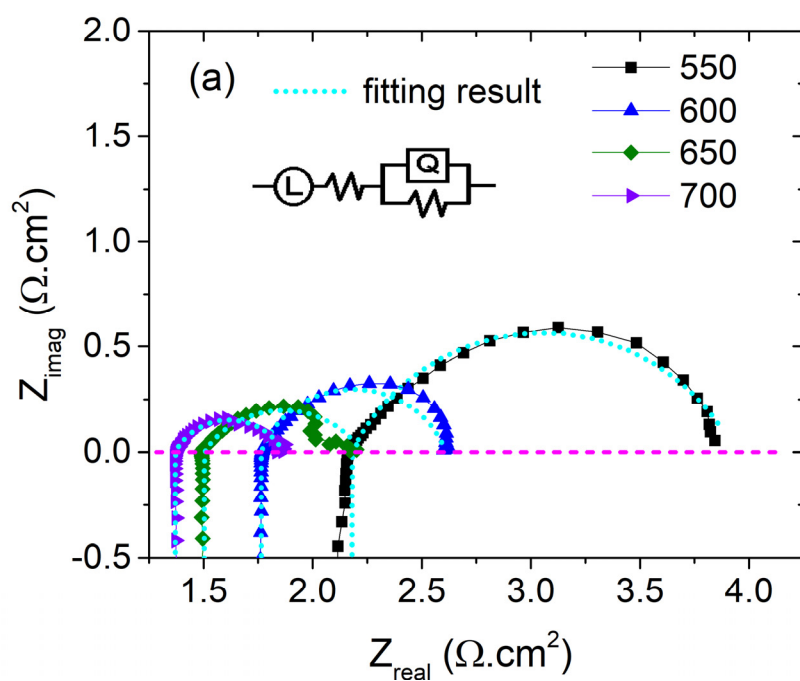

**Figure S2.** Nyquist plots of a symmetric PBF|SDC|PBF cell at different temperatures.

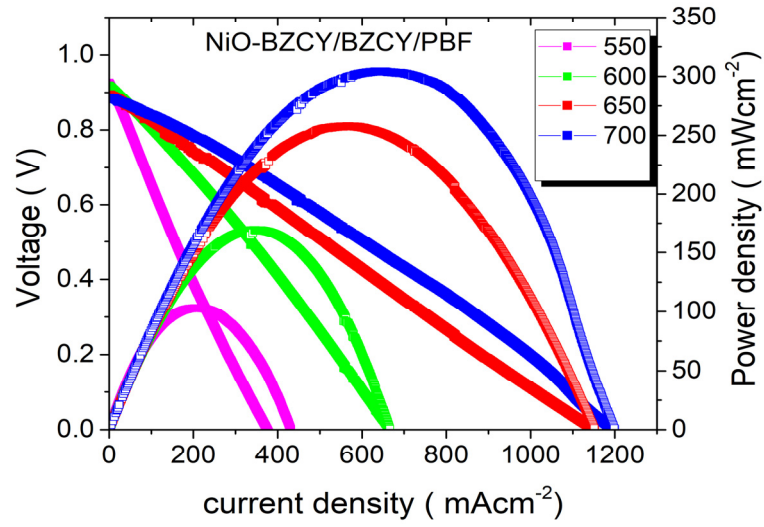

**Figure S3.** I–V–P curves of single-cell based on PBF cathode operated from 550 °C to 700 °C, with humidified H<sub>2</sub> (3% H<sub>2</sub>O) as anode fuel and ambient air as oxidant.

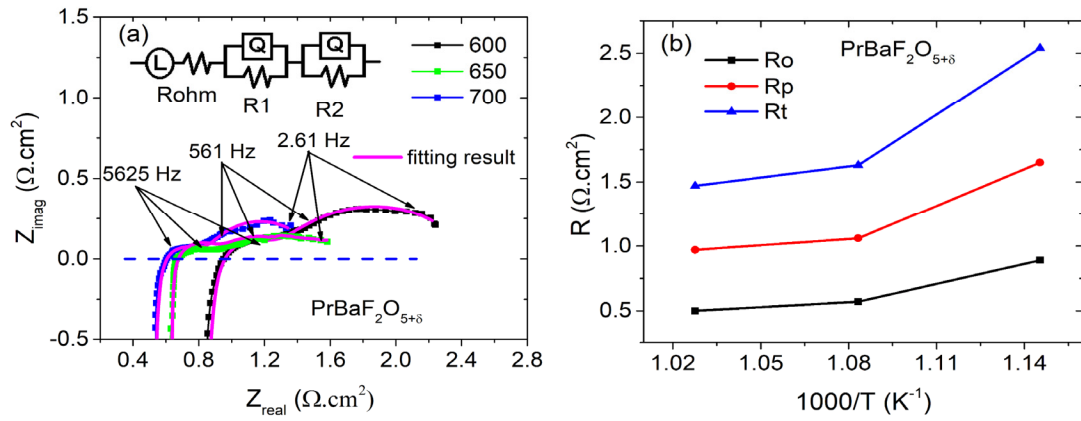

**Figure S4.** (a) Impedance spectra for single cells with PBF cathode measured under open-circuit conditions at different temperatures in the range of 600–700 °C. (b) The interfacial polarization resistances ( $R_p$ ), ohmic resistances ( $R_o$ ), total resistance ( $R_t$ ), obtained from the impedance spectra at different temperatures of the cell.

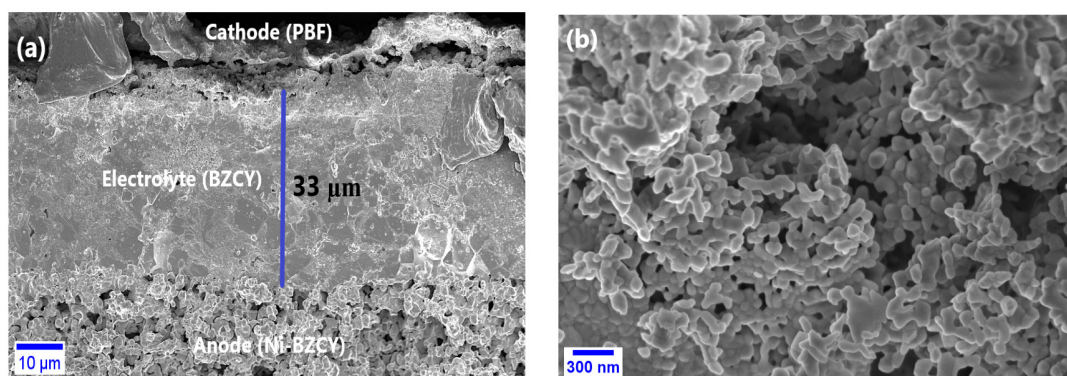

**Figure S5.** SEM micrographs of cell after testing: (a) the cross-section of tri-layer cell with PBF cathode and BZCY electrolyte (b) microstructure of PBF cathode.

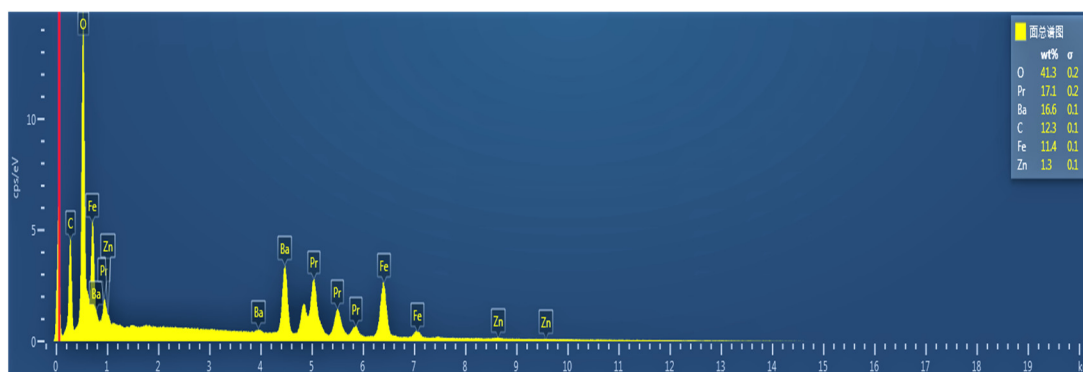

**Figure S6.** Energy dispersive spectrum (EDX) results for PBFZ powder calcined at 1000 °C.

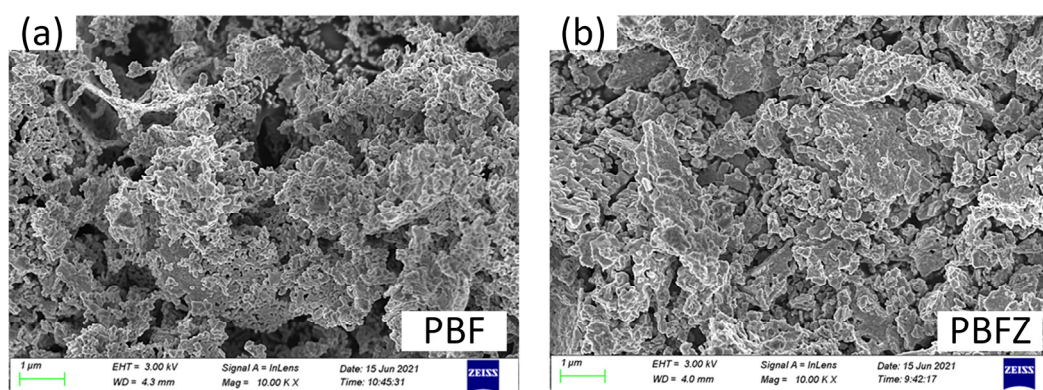

**Figure S7.** Microstructure results for (a) PBF and (b) PBFZ cathode after testing.
